# Supplementary material
Source: HighWire-hosted journal article supplement (https://dmd.aspetjournals.org/highwire/filestream/66038/field_highwire_adjunct_files/0/supplemental_table_39545.pdf)
Supplement: supplemental_table_39545.pdf [file supplemental_table_39545.pdf]

**Effect of Culture Time on the Basal Expression Levels of Drug Transporters in Sandwich-Cultured Primary Rat Hepatocytes**

Eskouhie H. Tchapanian, Jessica S. Houghton, Craig Uyeda, Mark P. Grillo, and Lixia Jin

**Supplemental Table 1:**

| <b>Antibody</b> | <b>Vendor</b>       | <b>Clonality</b> |
|-----------------|---------------------|------------------|
| MDR1-D-11       | Santa- Cruz Biotech | Monoclonal       |
| M2III-6 (Mrp2)  | Enzo Life Sciences  | Monoclonal       |
| BXP-53 (Bcrp)   | Enzo Life Sciences  | Monoclonal       |
| Oatp1           | Millipore           | Polyclonal       |
| Oatp2           | Millipore           | Polyclonal       |
| ZO-1            | Invitrogen          | Monoclonal       |
| CD26/DPPIV      | Thermo              | Monoclonal       |
| Mrp1            | abcam               | Monoclonal       |
| Ntcp            | abcam               | Polyclonal       |
| Bsep            | abcam               | Polyclonal       |
| Pou2f1          | abcam               | Polyclonal       |
| GAPDH           | Sigma               | Monoclonal       |

List of primary rat specific antibodies used in the present study

\*For western analysis, conjugated anti-mouse or anti-rabbit secondary antibodies used were from LI-COR Biosciences (Lincoln, NE).
